# Supplementary material
Source: Springer Nature journal article supplement (https://www.springermedizin.de/resource/supplementary/12889_2013_5921_MOESM3_ESM.pdf/9496576)

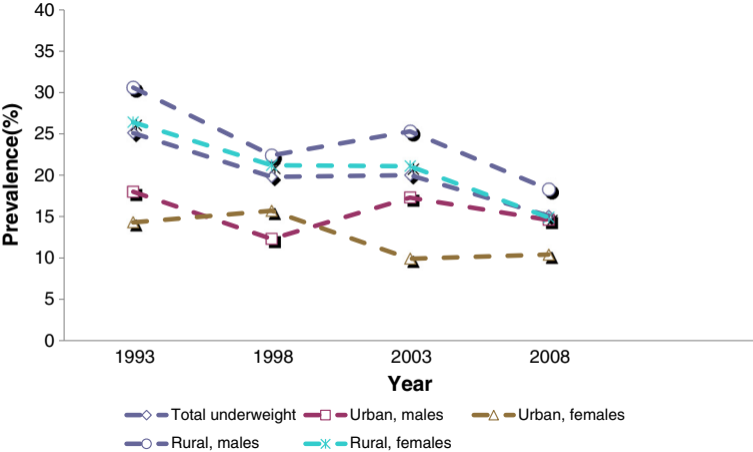

Supplement: MOESM3 [file 9496576]
